# Supplementary material
Source: Research Square preprint supplement (doi:10.21203/rs.3.rs-8726224/v1)
Supplement: Supplementary file 1 [file 2874a99e7ba265269d245052.docx]

**Supplementary Files**

**Supplementary Table 1. Characteristics of stroke patients (N = 400)**

| **Variables** | **N (%) /M ± SD** |
| --- | --- |
| Gender |  |
| Male | 280 (70.0) |
| Female | 120 (30.0) |
| Age (years) | 61.55 ± 12.05 |
| Marital status |  |
| Married | 357 (89.3) |
| Widowed | 23 (5.8) |
| Divorced | 12 (3.0) |
| Unmarried | 8 (2.0) |
| Monthly income (RMB) |  |
| ＜5000 | 292 (73.0) |
| 5001-8000 | 47 (11.8) |
| >8001 | 35 (8.8) |
| Unclear | 26 (6.5) |
| Primary caregiver |  |
| Spouse | 272 (68.0) |
| Children | 80 (20.0) |
| None | 34 (8.5) |
| Professional caregiver | 7 (1.8) |
| Others | 7 (1.8) |
| Lesion type |  |
| Ischemic stroke | 369 (98.5) |
| Intracerebral hemorrhage | 31 (7.8) |
| Smoking history |  |
| No | 238 (59.5) |
| Yes | 127 (31.8) |
| Quit | 35 (8.8) |
| Drinking history |  |
| No | 259 (64.8) |
| Yes | 114 (28.5) |
| Quit | 27 (6.8) |
| Daily sleep duration(hours) | 6.66 ± 1.88 |
| Number of comorbid chronic conditions |  |
| 1 | 171 (42.8) |
| ≥2 | 142 (35.5) |
| None | 87 (21.8) |
| NIHSS | 3.35 ± 3.91 |

**Supplementary Table 2. Differences in sociodemographic and disease characteristics among neuropsychiatric disturbance categories of stroke patients (N = 400)**

| **Variables** | **Profile 1**  **(N = 63)** | **Profile 2**  **(N = 37)** | **Profile 3**  **(N = 265)** | **Profile 4**  **(N = 35)** | ***χ2*/*F*** | ***P*** |
| --- | --- | --- | --- | --- | --- | --- |
| Gender |  |  |  |  | 0.52a | 0.913 |
| Female | 45 (71.4) | 27 (73.0) | 185 (69.8) | 23 (65.7) |
| Male | 18 (28.6) | 10 (27.0) | 80 (30.2) | 12 (34.3) |
| Age (years) | 61.96 ± 12.37 | 67.67 ± 11.68 | 60.21 ± 11.77 | 64.51 ± 11.90 | 5.15b | **0.002** |
| Marital status |  |  |  |  | 11.16 | 0.265 |
| Married | 58 (92.1) | 36(97.3) | 323 (87.5) | 31 (88.6) |
| Widowed | 3 (4.8) | 1 (2.7) | 15 (5.7) | 4 (11.4) |
| Unmarried | 2 (3.2) | 0 (0.0) | 6 (2.3) | 0 (0.0) |
| Divorced | 0 (0.0) | 0 (0.0) | 12 (4.5) | 0 (0.0) |
| Monthly income (RMB) |  |  |  |  | 12.08a | 0.209 |
| ＜5000 | 46 (73.0) | 25 (67.6) | 195 (73.6) | 26 (74.3) |
| 5001-8000 | 9 (14.3) | 4 (10.8) | 31 (11.7) | 3 (8.6) |
| >8001 | 8 (12.7) | 5 (13.5) | 17 (6.4) | 5 (14.3) |
| Unclear | 0 (0.0) | 3 (8.1) | 22 (8.3) | 1 (2.9) |
| Primary caregiver |  |  |  |  | 14.08a | 0.295 |
| Spouse | 37 (58.7) | 28 (75.7) | 184 (69.4) | 23 (65.7) |
| Children/Parents | 15 (23.8) | 4 (10.8) | 53 (20.0) | 8 (22.9) |
| None | 7 (11.1) | 5 (13.5) | 20 (7.5) | 2 (5.7) |
| Professional Caregiver | 1 (1.6) | 0 (0.0) | 4 (1.5) | 2 (5.7) |
| Others | 3 (4.8) | 0 (0.0) | 4 (1.5) | 0 (0.0) |
| Lesion type |  |  |  |  | 14.27a | **0.003** |
| Ischemic stroke | 63 (100.0) | 36 (97.3) | 242 (91.3) | 28 (80.0) |
| Intracerebral hemorrhage | 0 (0.0) | 1 (2.7) | 23 (8.7) | 7 (20.0) |
| Smoking history |  |  |  |  | 13.10a | **0.041** |
| No | 41 (65.1) | 28 (75.7) | 149 (56.2) | 20 (57.1) |
| Yes | 19 (30.2) | 8 (21.6) | 92 (34.7) | 8 (22.9) |
| Quit | 3 (4.8) | 1 (2.7) | 24 (9.1) | 7 (20.0) |
| Drinking history |  |  |  |  | 5.06a | 0.535 |
| No | 46 (73.0) | 27 (73.0) | 163 (61.5) | 23 (65.7) |
| Yes | 13 (20.6) | 9 (24.3) | 83 (31.3) | 9 (25.7) |
| Quit | 4 (6.3) | 1 (2.7) | 19 (7.2) | 3 (8.6) |
| Daily sleep duration(hours) | 7.65 ± 1.59 | 6.35 ± 2.26 | 6.52 ± 1.74 | 6.25 ± 2.41 | 7.42b | **＜0.001** |
| Number of comorbid chronic conditions |  |  |  |  | 5.89a | 0.435 |
| 1 | 32 (50.8) | 14 (37.8) | 113 (42.6) | 12 (34.3) |  |  |
| ≥2 | 16 (25.4) | 14 (37.8) | 95 (35.8) | 17 (48.6) |  |  |
| None | 15 (23.8) | 9 (24.3) | 57 (21.5) | 6 (17.1) |  |  |
| NIHSS | 2.11 ± 2.50 | 3.21 ± 3.15 | 3.60 ± 4.24 | 3.77 ± 3.88 | 2.66b | **0.048** |

Note. *a*: *χ2*,b: *F*. Bold numbers indicate significant group differences. Profile 1 = asymptomatic, Profile 2 = mild depression-sleep-cognitive impairment, Profile 3 = mild depression-sleep disorder, Profile 4 = major depression-sleep-cognitive disorder.

**Supplementary Table 3. Differences in functional independence among neuropsychiatric disturbance categories of stroke patients (N = 400)**

| **Variables** | **Profile 1**  **(N = 63)** | **Profile 2**  **(N = 37)** | **Profile 3**  **(N = 265)** | **Profile 4**  **(N = 35)** | ***F*** | ***P*** |
| --- | --- | --- | --- | --- | --- | --- |
| Barthel Index | 85. 95 ± 21.36 | 72.02 ± 27.27 | 73.84 ± 25.37 | 61.71 ±27.19 | 7.55 | **＜0.001** |
| Bowels | 9.76 ± 1.39 | 9.32 ± 2.09 | 9.89 ± 0.74 | 9.43 ± 1.61 | 3.85 | **0.010** |
| Bladder | 9.60 ± 1.86 | 8.92 ± 2.39 | 9.51 ± 1.93 | 8.29 ± 3.41 | 4.18 | **0.006** |
| Grooming | 4.21 ± 1.84 | 3.78 ± 2.17 | 3.47 ± 2.30 | 3.00 ± 2.48 | 2.71 | **0.044** |
| Bathing | 3.89 ± 2.09 | 2.43 ± 2.53 | 2.11 ± 2.47 | 1.71 ± 2.40 | 10.13 | **＜0.001** |
| Toilet use | 8.41 ± 2.95 | 6.49 ± 3.88 | 7.00 ± 3.66 | 5.71 ± 3.86 | 4.93 | **0.002** |
| Feeding | 9.05 ± 2.67 | 7.30 ± 3.45 | 8.08 ± 2.93 | 6.86 ± 3.44 | 4.97 | **0.002** |
| Dressing | 8.49 ± 2.92 | 7.84 ± 3.23 | 7.57 ± 3.04 | 6.71 ± 3.41 | 2.75 | **0.042** |
| Transfer | 13.25 ± 3.37 | 11.08 ± 4.43 | 11.49 ± 4.23 | 10.14 ± 5.07 | 4.88 | **0.002** |
| Mobility | 12.62 ± 4.19 | 10.00 ± 5.27 | 9.89 ± 5.88 | 7.14 ± 6.09 | 7.58 | **＜0.001** |
| Stairs | 6.67 ± 3.81 | 4.86 ± 3.99 | 4.85 ± 4.23 | 2.71 ± 3.70 | 7.17 | **＜0.001** |

Note. Bold numbers indicate significant group differences.

**Supplementary Table 4. Characteristics of two groups with and without neuropsychiatric disturbances (N = 400)**

| **Variables** | **Asymptomatic**  **(N = 60)** | **Neuropsychiatric disturbance**  **(N = 60)** | ***χ2*/*t*** | ***P*** |
| --- | --- | --- | --- | --- |
| Age (years) | 61.58 ± 12.42 | 62.85 ± 15.34 | 1.57b | 0.212 |
| Daily sleep duration(hours) | 7.45 ± 1.23 | 7.48 ± 2.26 | 0.11b | 0.739 |
| NIHSS | 1.95 ± 2.11 | 2.26 ± 2.67 | 0.49 | 0.482 |
| Smoking history |  |  | 0.78a | 0.675 |
| No | 40 (66.7) | 39 (65.0) |
| Yes | 15 (25.0) | 18 (30.0) |
| Quit | 5 (8.3) | 3 (5.0) |  |  |

Note. *a*: *χ2*,b: *t*.

**Supplementary Table 5. Two groups of test results after propensity score matching (N = 120)**

| **Variables** | **Asymptomatic**  **(N = 60)** | **Neuropsychiatric disturbance**  **(N = 60)** | ***t*** | ***P*** |
| --- | --- | --- | --- | --- |
| BI | 88.08 ± 17.32 | 77.91 ± 22.40 | 7.59 | **0.007** |

Note. Bold numbers indicate significant group differences. BI: Barthel Index.
